# Supplementary figures and images for: Life cycle inventory improvement in the pharmaceutical sector: assessment of the sustainability combining PMI and LCA tools
Source: Royal Society of Chemistry journal article supplement (doi:10.1039/c5gc00424a), 2015-01-01

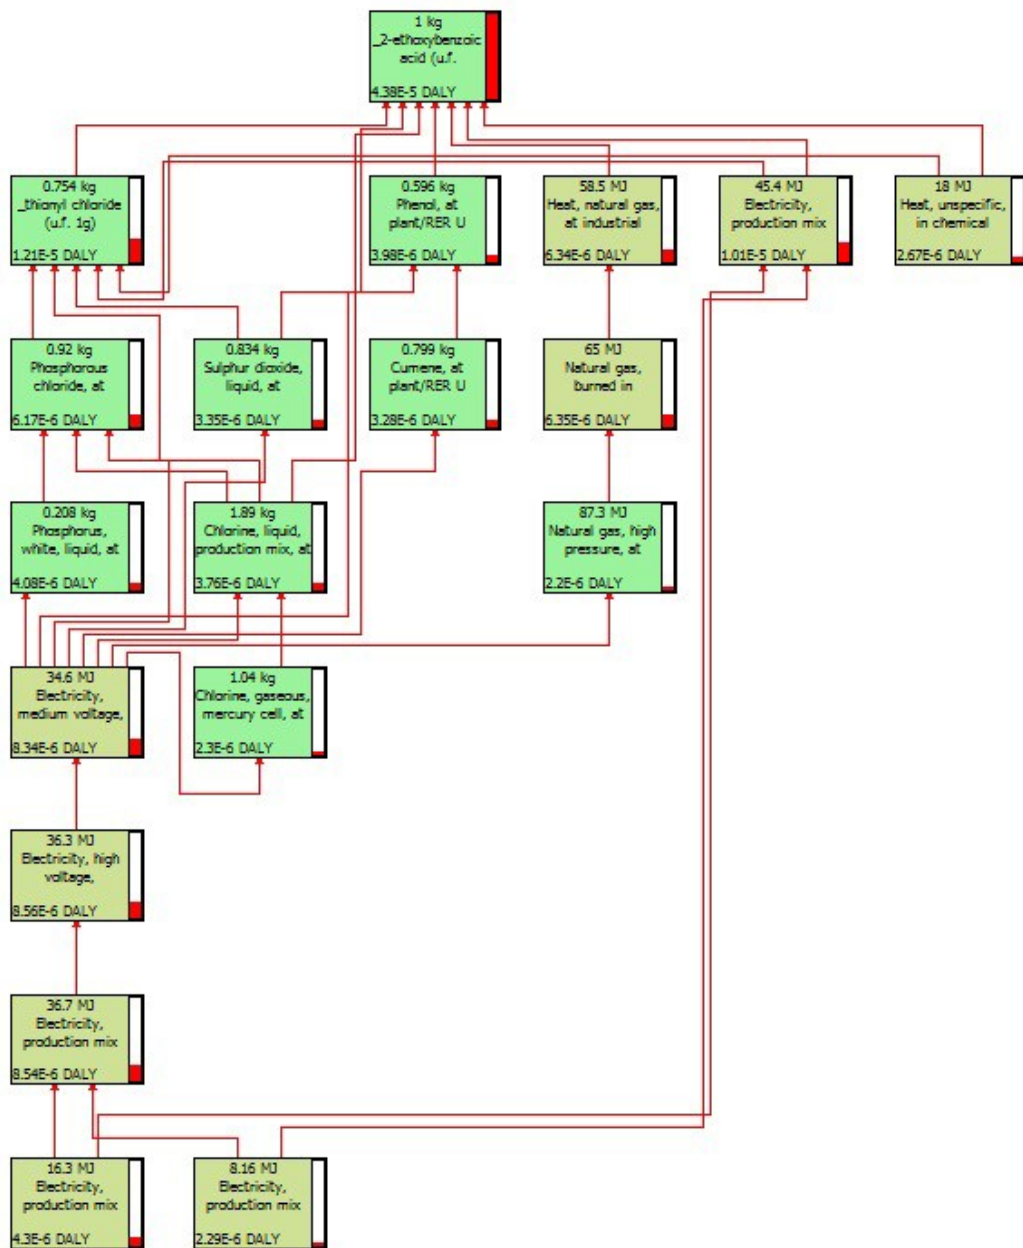

Supplement: c5gc00424a2.pdf [file c5gc00424a2.pdf]

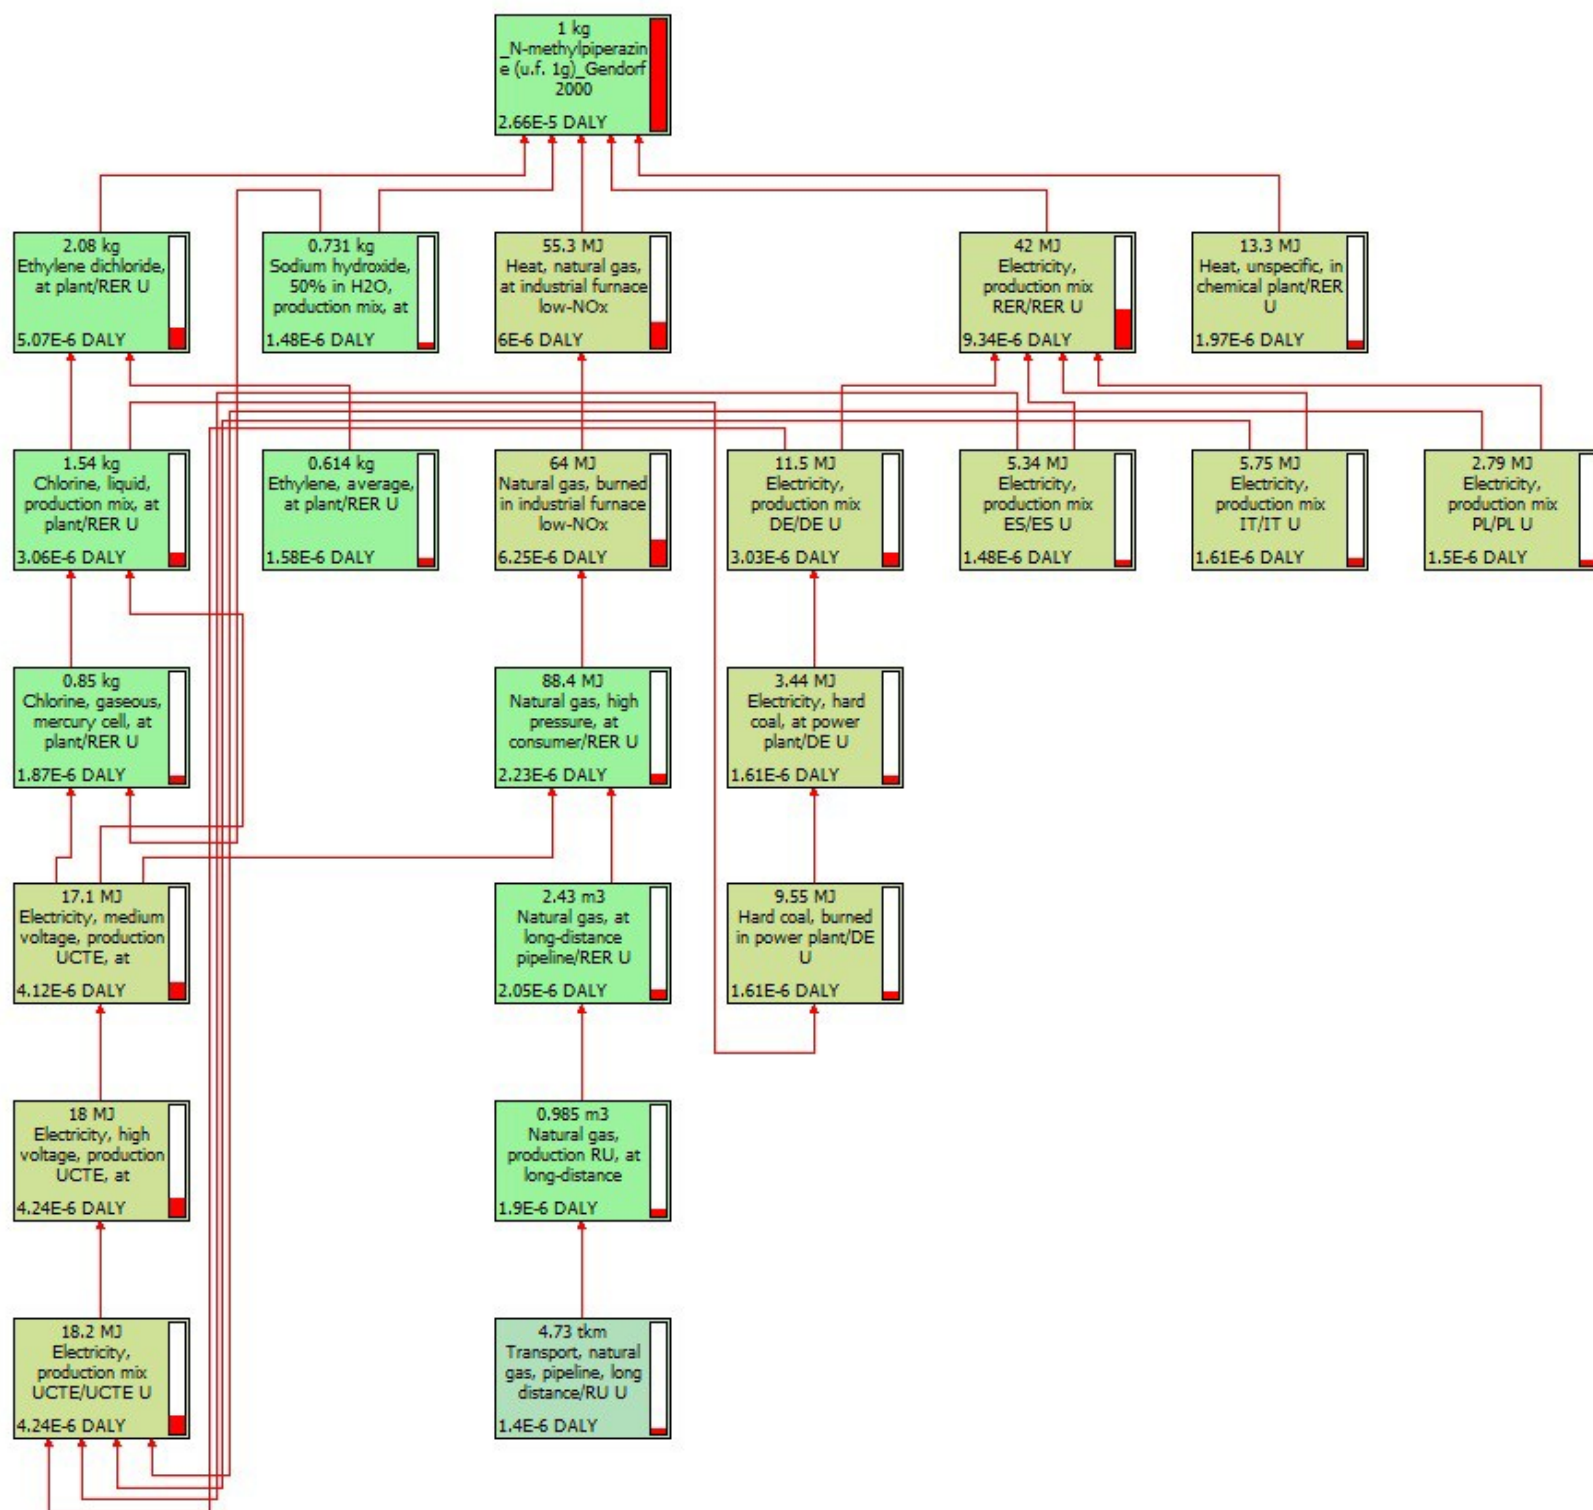

Supplement: c5gc00424a3.pdf [file c5gc00424a3.pdf]

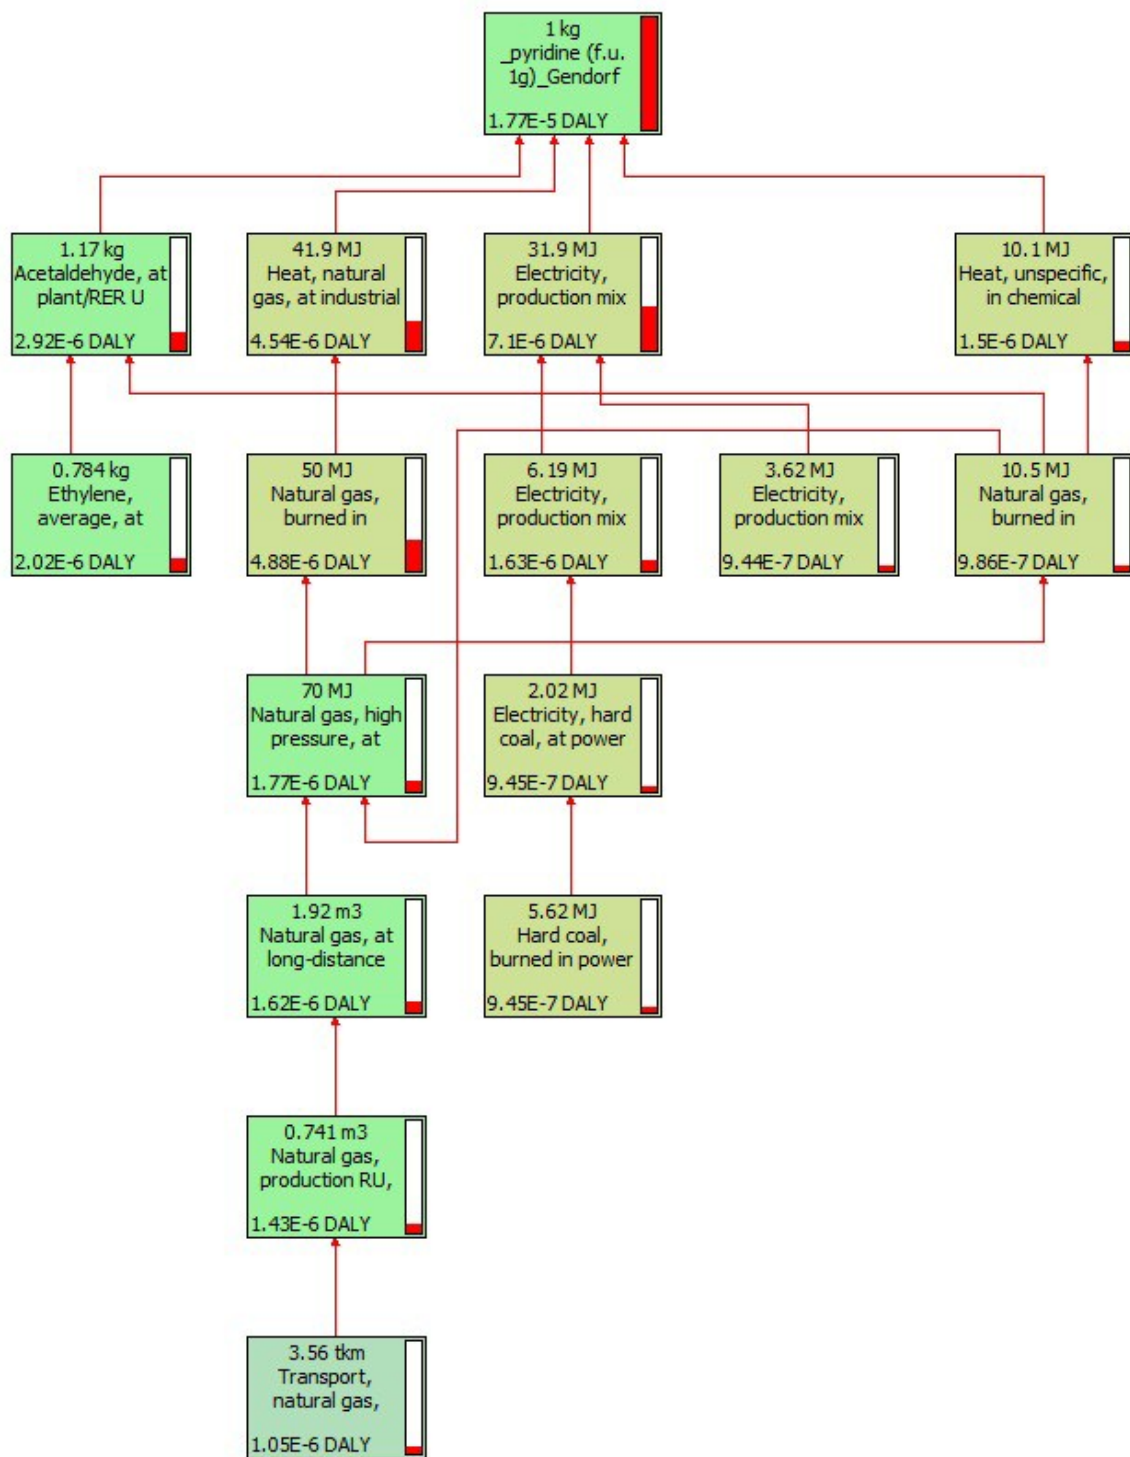

Supplement: c5gc00424a4.pdf [file c5gc00424a4.pdf]
